# Supplementary material for: Macrophage lineage cells-derived migrasomes activate complement-dependent blood-brain barrier damage in cerebral amyloid angiopathy mouse model
Source: PubMed Central journal article supplement (PMC10319857; doi:10.1038/s41467-023-39693-x), 2023-07-04
Supplement: 41467_2023_39693_MOESM1_ESM.pdf [file 41467_2023_39693_MOESM1_ESM.pdf]

# Supplementary Material

## Supplementary Figures

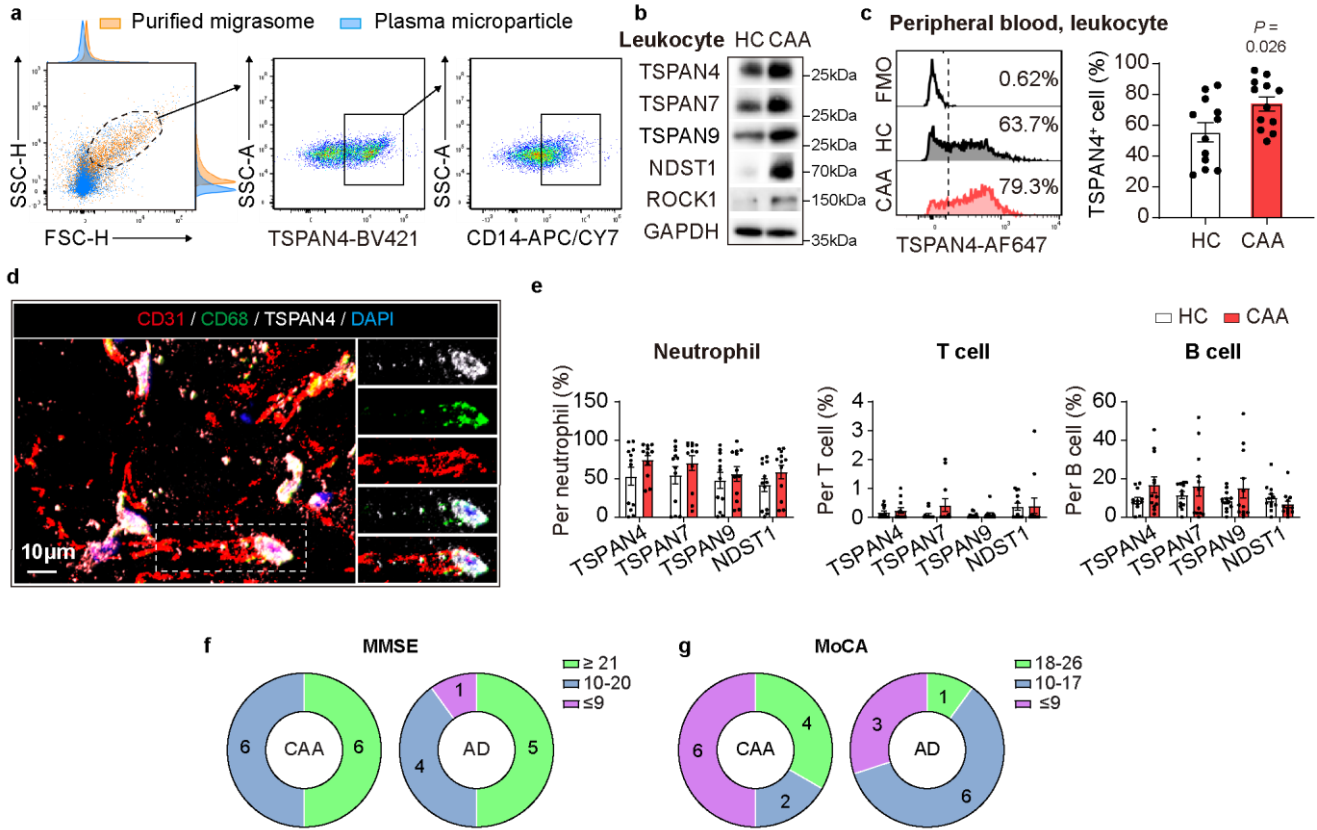

**Figure S1. Excessive migrasome production in CAA is not observed in immune cells other than macrophages.** (a) Gating strategy of plasma migrasomes in flow cytometric analysis. Purified migrasomes derived from BMDM *in vitro* were set as FSC/SSC scale standard. Migrasomes were further identified as TSPAN4<sup>+</sup> particles. (b-c) Leukocytes in peripheral blood of CAA patients and age- and sex-matched healthy controls (HC) were isolated after red blood cell lysis. (b) Representative western blot images showing the elevated migrasome markers expression in leukocytes of CAA patients. Data shown are representative of 3 biologically independent experiments. (c) Migrasome marker expression in circulating leukocytes of the recruited cohort was analyzed with flow cytometry. TSPAN4 expression in CAA patients and HC. *N* = 12 in CAA groups. *N* = 12 in HC group. Data are presented as mean values ± SEM with the indicated significance (by two-tailed Student's *t* test). (d) Skin autopsy samples of CAA patients were subjected to immunostaining of CD68 (green), TSPAN4 (grey) and CD31 (red). Data shown are representative of 3 biologically independent experiments. (e) Migrasome marker expression in neutrophil (CD66b<sup>+</sup>), T cell (CD3<sup>+</sup>) and B cell (CD19<sup>+</sup>). *N* = 12 in CAA groups. *N* = 12 in HC group. Data are presented as mean values ± SEM, and no

18 statistically significant differences were observed (by two-tailed Student's  $t$  test). **(f-g)** MMSE **(f)** and MoCA  
19 **(g)** scoring of recruited CAA and AD patients.  $N = 12$  in CAA group and  $N = 10$  in AD group. Source data are  
20 provided as a Source Data file.

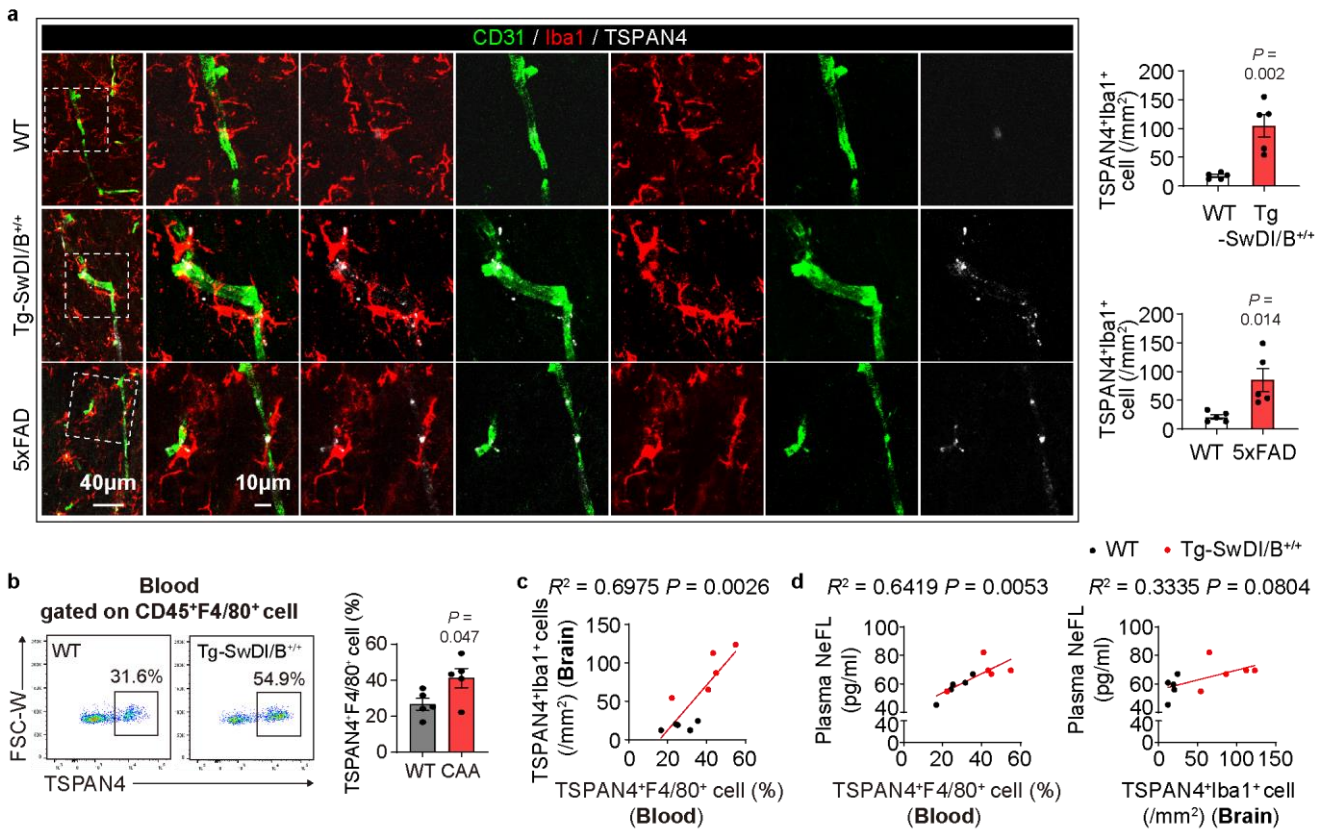

21

22 **Figure S2. Migrasome production in CAA brains.** Age- and sex-matched wild type (WT), Tg-SwDI/B<sup>+/+</sup>

23 and 5xFAD mice were sacrificed at 24w of age. (a) Coronal brain sections of WT, Tg-SwDI/B<sup>+/+</sup> and 5xFAD

24 mice were subjected to immunostaining of the microglia/macrophage marker Iba1 (red), the blood vessel

25 marker CD31 (green) and the migrasome marker TSPAN4 (grey) and analyzed with confocal microscopy.

26 The number of TSPAN4 expressing Iba1<sup>+</sup> cells in WT and CAA mice was calculated. N = 5 in both groups.

27 Data are presented as mean values ± SEM with the indicated significance (by two-tailed Student's t test). (b)

28 TSPAN4 expression in circulating monocytes/macrophages (CD45<sup>+</sup>F4/80<sup>+</sup> cells) of Tg-SwDI/B<sup>+/+</sup> mice was

29 assessed with flow cytometry. N = 5 in both groups. Data are presented as mean values ± SEM with the

30 indicated significance (by two-tailed Student's t test). (c) Association of migrasome productivity (TSPAN4

31 expression) of brain microglia/macrophages (Iba1<sup>+</sup> cells) and blood monocytes/macrophages (CD45<sup>+</sup>F4/80<sup>+</sup>

32 cells) in WT (Black dots) and Tg-SwDI/B<sup>+/+</sup> mice (red dots) was evaluated with Spearman correlation analysis.

33 The data is represented using numerical values along with a regression line, and R<sup>2</sup> and P value were presented.

34 N = 5 in both groups. (d) Spearman correlation analysis for the association between plasma NeFL

35 concentration and TSPAN4 expression of brain microglia/macrophages (Iba1<sup>+</sup> cells) (Left) or blood

36 monocytes/macrophages (CD45<sup>+</sup>F4/80<sup>+</sup> cells) in WT (Black dots) and Tg-SwDI/B<sup>+/+</sup> mice (red dots) (Right).

37  $N = 5$  in both groups. The data is represented using numerical values along with a regression line, and  $R^2$  and  
38  $P$  value were presented. Source data are provided as a Source Data file.  
39

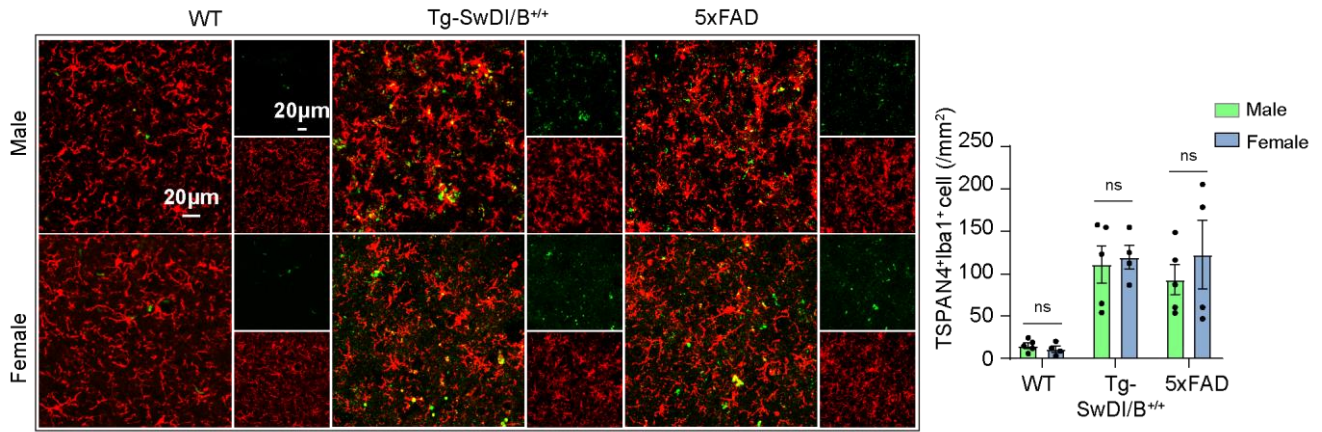

40  
 41 **Figure S3. Sexual impact on migrasome production in CAA models.** Age- and sex-matched wild type  
 42 (WT), Tg-SwDI/B<sup>+/+</sup> and 5xFAD mice were sacrificed at 24w of age. Migrasome production in the brain  
 43 microglia/macrophage of male ( $N = 5$  in WT mice,  $N = 5$  in Tg-SwDI/B<sup>+/+</sup> mice,  $N = 5$  in 5xFAD mice) and  
 44 female ( $N = 4$  in WT mice,  $N = 4$  in Tg-SwDI/B<sup>+/+</sup> mice,  $N = 4$  in 5xFAD mice) CAA models was calculated.  
 45 Data are presented as mean values  $\pm$  SEM, and no statistically significant differences were observed (by two-  
 46 tailed Student's  $t$  test). Source data are provided as a Source Data file.

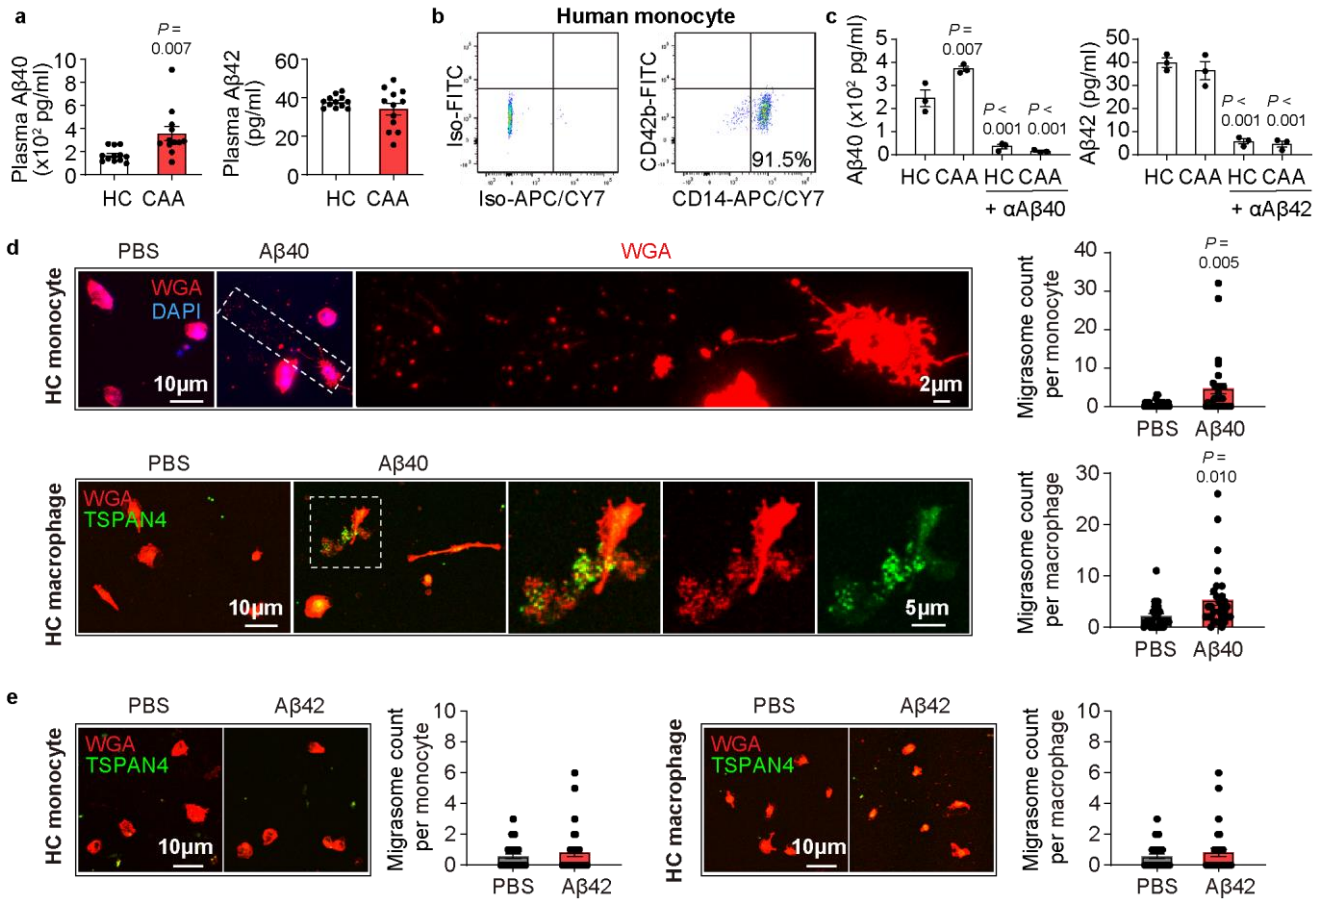

47 **Figure S4. Aβ40 is a sufficient inducer of macrophage-derived migrasomes.** (a) Concentration of Aβ40  
 48 and Aβ42 in CAA plasma.  $N = 12$  in CAA groups.  $N = 12$  in HC group. Data are presented as mean values  $\pm$   
 49 SEM with the indicated significance (by two-tailed Student's  $t$  test). (b) Human monocytes were isolated from  
 50 peripheral blood of healthy donors. Purity of the isolated monocytes was assessed with flow cytometry. Data  
 51 shown are representative of 3 biologically independent experiments. Purity of monocytes was  $89.30 \pm 1.332\%$   
 52 (mean  $\pm$  SEM). Data shown are representative of 3 biologically independent experiments. (c) Decrease of  
 53 Aβ40 / Aβ42 level in plasma after Aβ40 / Aβ42 removal by immunoprecipitation of Aβ40 / Aβ42 protein with  
 54 monoclonal antibodies. Data shown are representative of 3 biologically independent experiments. Data are  
 55 presented as mean values  $\pm$  SEM with the indicated significance (compared with the HC serum without  
 56 antibodies application by one-way ANOVA followed by Tukey's post-test). (d-e) Aβ40 or Aβ42 was treated  
 57 to monocytes or monocyte-derived macrophages (20μg/ml, 6h). Migrasome productivity upon Aβ40 (d) or  
 58 Aβ42 (e) treatment was evaluated with immunostaining of WGA (red) alone or with TSPAN4 (green). Data  
 59 are presented as mean values  $\pm$  SEM with the indicated significance (d), and no statistically significant  
 60 differences were observed upon Aβ42 treatment (e) (by two-tailed Student's  $t$  test). Data shown are  
 61 representative of 3 biologically independent experiments and migrasomes of 30 cells are calculated. Source  
 62 data are provided as a Source Data file.



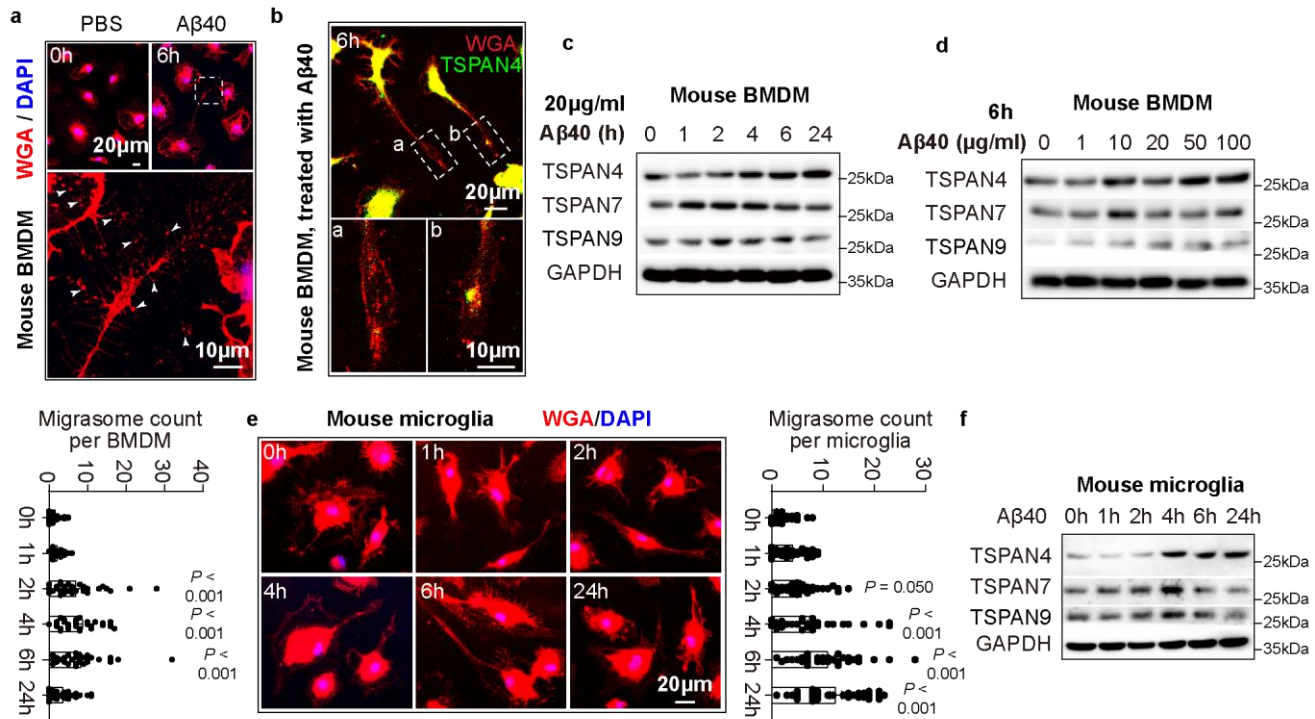

64  
65 **Figure S5. Migrasome productivity of mouse macrophage and microglia upon A $\beta$ 40 stimulation. (a-d)**  
66 Mouse bone marrow derived macrophages (BMDM) were cultured and treated with A $\beta$ 40. (a-b) Migrasome  
67 production in BMDM upon A $\beta$ 40 stimulation (20 $\mu$ g/ml) was evaluated with immunostaining of WGA (red)  
68 alone (a) or with TSPAN4 (green) (b). Representative confocal images were displayed. Data shown are  
69 representative of 3 biologically independent experiments and migrasomes of 30 cells are calculated. Data are  
70 presented as mean values  $\pm$  SEM with the indicated significance (compared with the 0h group by one-way  
71 ANOVA followed by Tukey's post-test). (c-d) Expression of migrasome markers by BMDM upon A $\beta$ 40  
72 treatment for indicated time period (20 $\mu$ g/ml) (c) or indicated concentration (6h) (d) was assessed with  
73 western blot. Data shown are representative of 3 biologically independent experiments. (e-f) Mouse  
74 microglia were isolated from pups of WT C57/BL6 mice. (e) Migrasome production was assessed with  
75 immunostaining of WGA upon A $\beta$ 40 treatment (20 $\mu$ g/ml) for indicated time points. Data shown are  
76 representative of 3 biologically independent experiments and migrasomes of 30 cells are calculated. Data are  
77 presented as mean values  $\pm$  SEM with the indicated significance (compared with the 0h group by one-way  
78 ANOVA followed by Tukey's post-test). (f) Expression of migrasome markers in mouse microglia upon  
79 A $\beta$ 40 treatment (20 $\mu$ g/ml) for indicated time points was assessed with western blot. Data shown are  
80 representative of 3 biologically independent experiments. Source data are provided as a Source Data file.

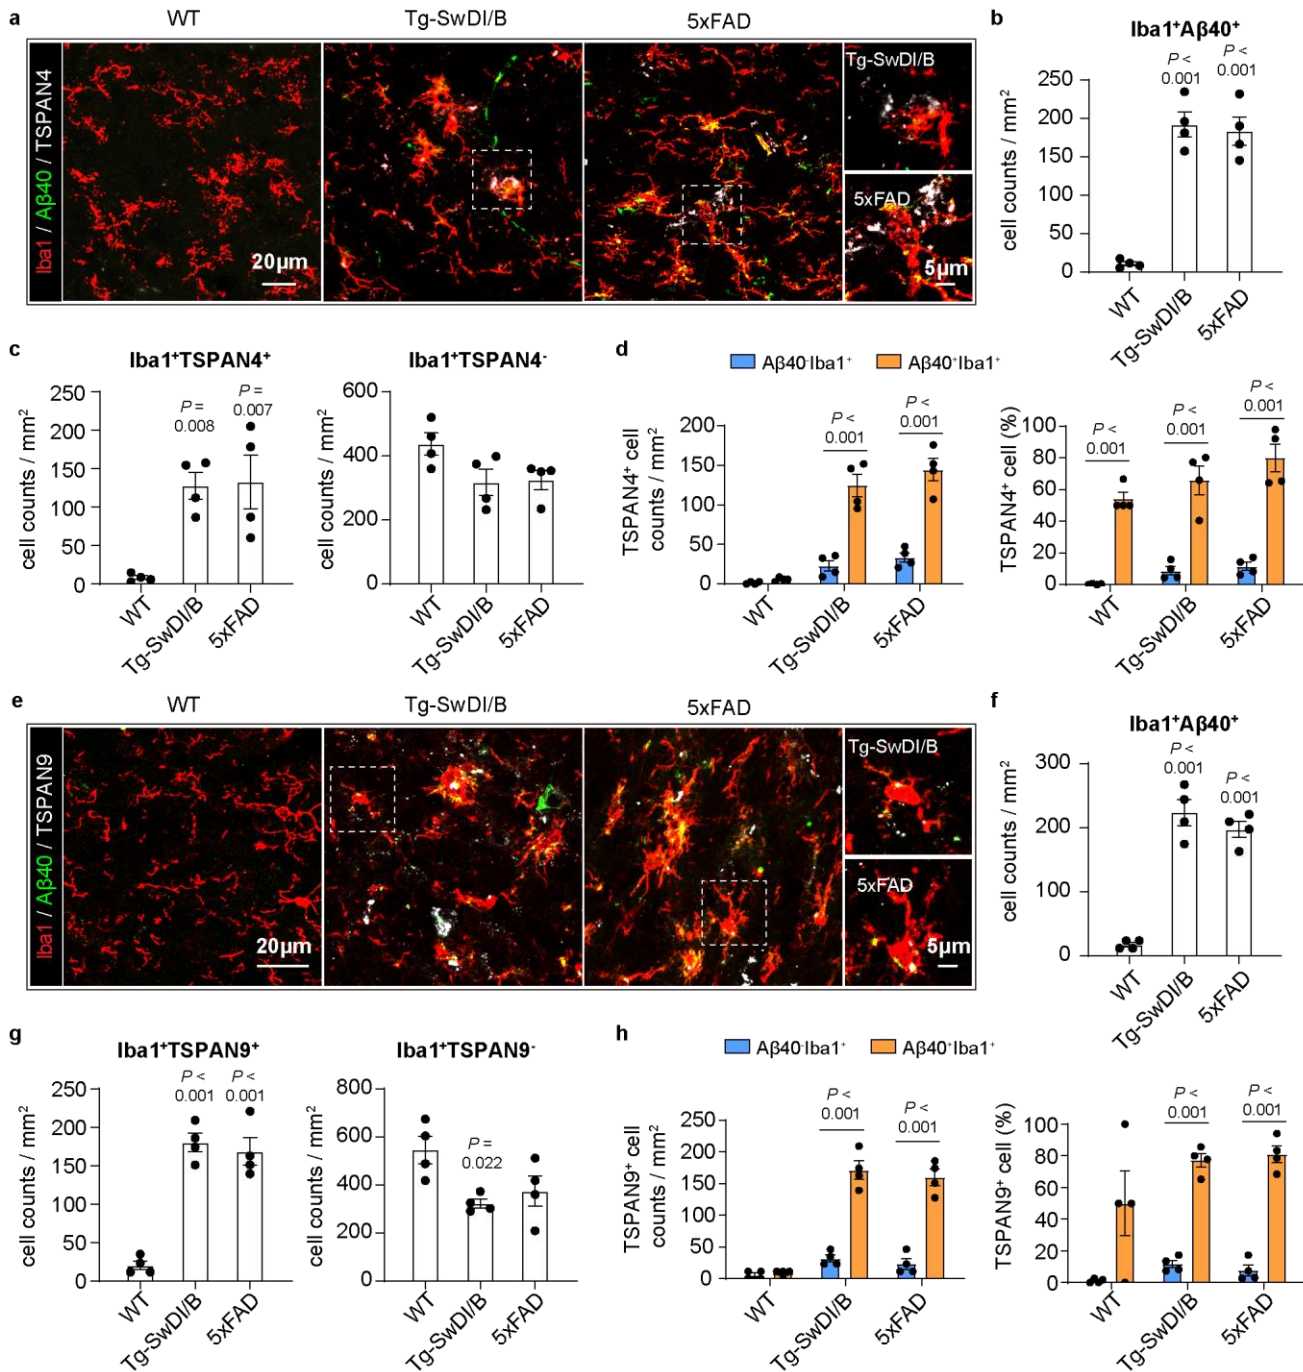

**Figure S6. Macrophage lineage cells produce migrasomes when encountering Aβ40 in CAA.** Coronal brain sections from Tg-SwDI/B<sup>+/+</sup> and 5xFAD mice or age- and sex-matched WT mice (24w of age, 2 male and 2 female in each group) were collected and subjected to immunostaining of Iba1/Aβ40/TSPAN4 (a-d) or Iba1/Aβ40/TSPAN9 (e-h). Aβ40 clearance (Iba1<sup>+</sup>Aβ40<sup>+</sup>, b and f), TSPAN4 (c) or TSPAN9 (g) expression (Iba1<sup>+</sup>TSPAN4<sup>+</sup> or Iba1<sup>+</sup>TSPAN9<sup>+</sup>) and the relationship between Aβ40 engulfment and migrasome production (TSPAN4<sup>+</sup>Aβ40<sup>+</sup>Iba1<sup>+</sup>, d or TSPAN9<sup>+</sup>Aβ40<sup>+</sup>Iba1<sup>+</sup>, h) in microglia/macrophage were calculated. Data shown are representative of 4 biologically independent experiments. Data are presented as mean values ± SEM with the indicated significance (b-c, f-g: compared with WT by one-way ANOVA



91 followed by Tukey's post-test; **d, h**: by two-tailed Student's  $t$  test). Source data are provided as a Source  
92 Data file.

93

94

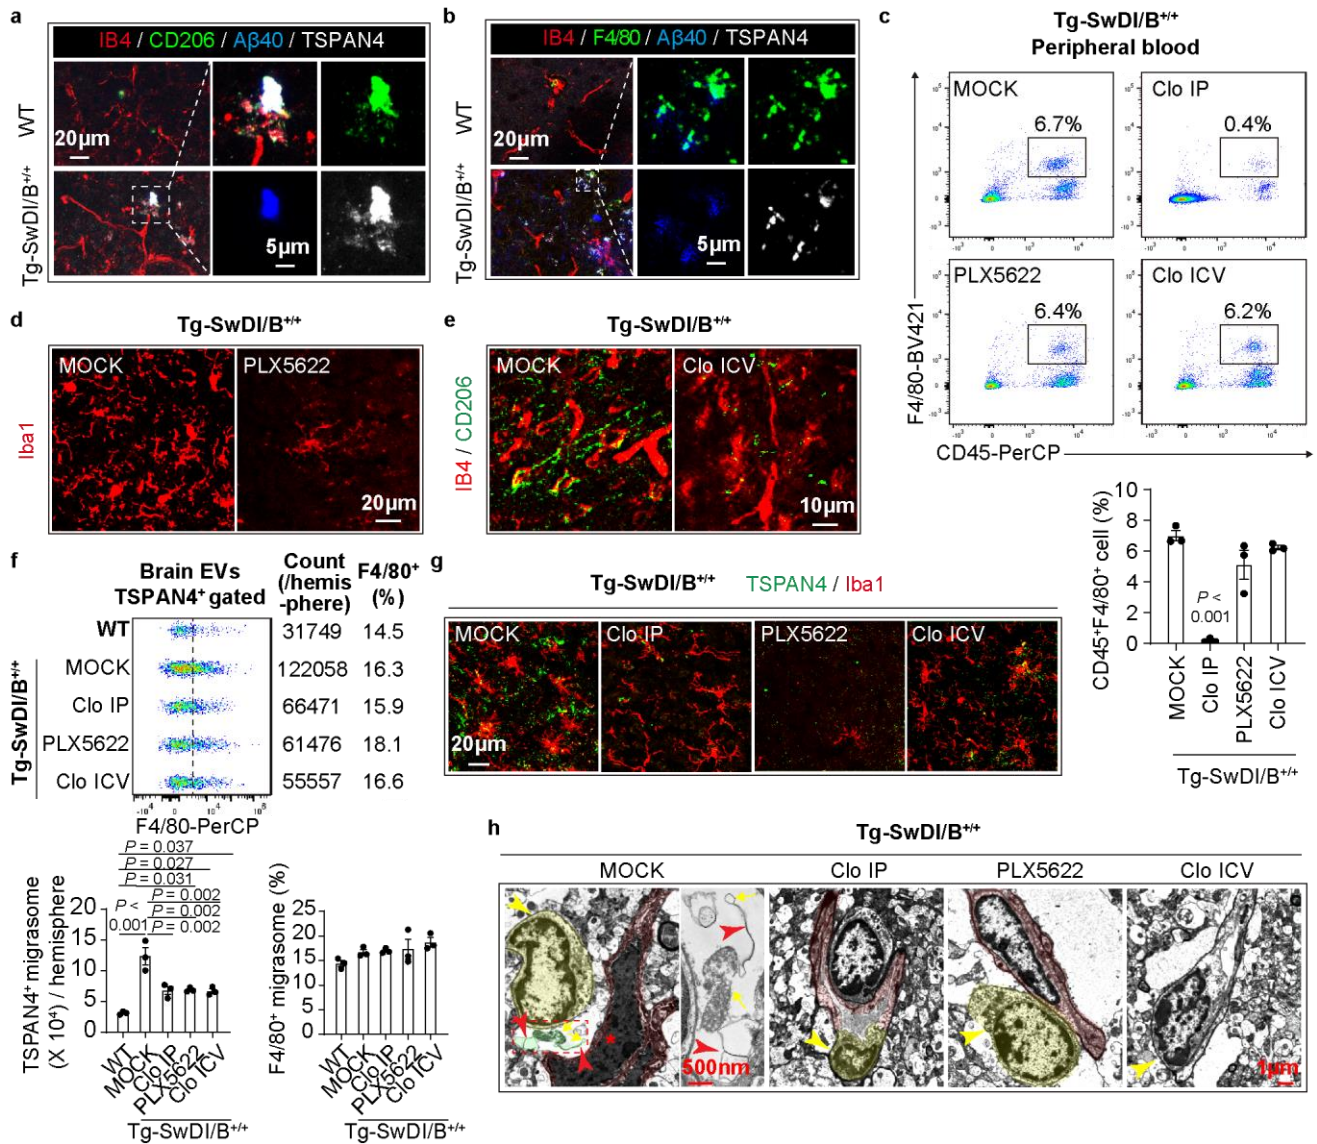

95  
 96 **Figure S7. Origin of migrasomes among brain macrophage lineage cells.** (a-b) Age- and sex-matched WT  
 97 and Tg-SwDI/B<sup>+/+</sup> were sacrificed at 24w of age. Coronal brain sections were subjected to immunostaining of  
 98 lectin (IB4, red), A $\beta$ 40 (blue), TSPAN4 (grey) and CD206 (green, PVM marker, **a**) or F4/80 (green, infiltrated  
 99 macrophages marker, **b**) Representative images showing migrasome produced by PVM or infiltrated  
 100 macrophages. Data are representative of 3 biologically independent experiments. (c-h) Microglia, PVM or  
 101 circulating monocytes were depleted respectively in Tg-SwDI/B mice (12w) by feed containing the CSF1R  
 102 inhibitor PLX5622, intra-cerebral ventricle injected clodronate liposomes (Clo ICV) or intraperitoneally  
 103 injected clodronate liposomes (CLO IP). *N* = 3 in each group. Depletion efficiency and the impact on other  
 104 macrophage subsets were assessed with flow cytometry (c) or immunostaining (d-e). Data are presented as  
 105 mean values  $\pm$  SEM with the indicated significance (compared with non-treated mice by one-way ANOVA).  
 106 Migrasome deposition in brain after depletion of macrophage subsets was analyzed with flow cytometry (f),  
 107 immunostaining (g) and TEM (h). Data are presented as mean values  $\pm$  SEM with the indicated significance

108 (by one-way ANOVA followed by Tukey's post-test). Data are representative of 3 biologically independent  
109 experiments. Source data are provided as a Source Data file.

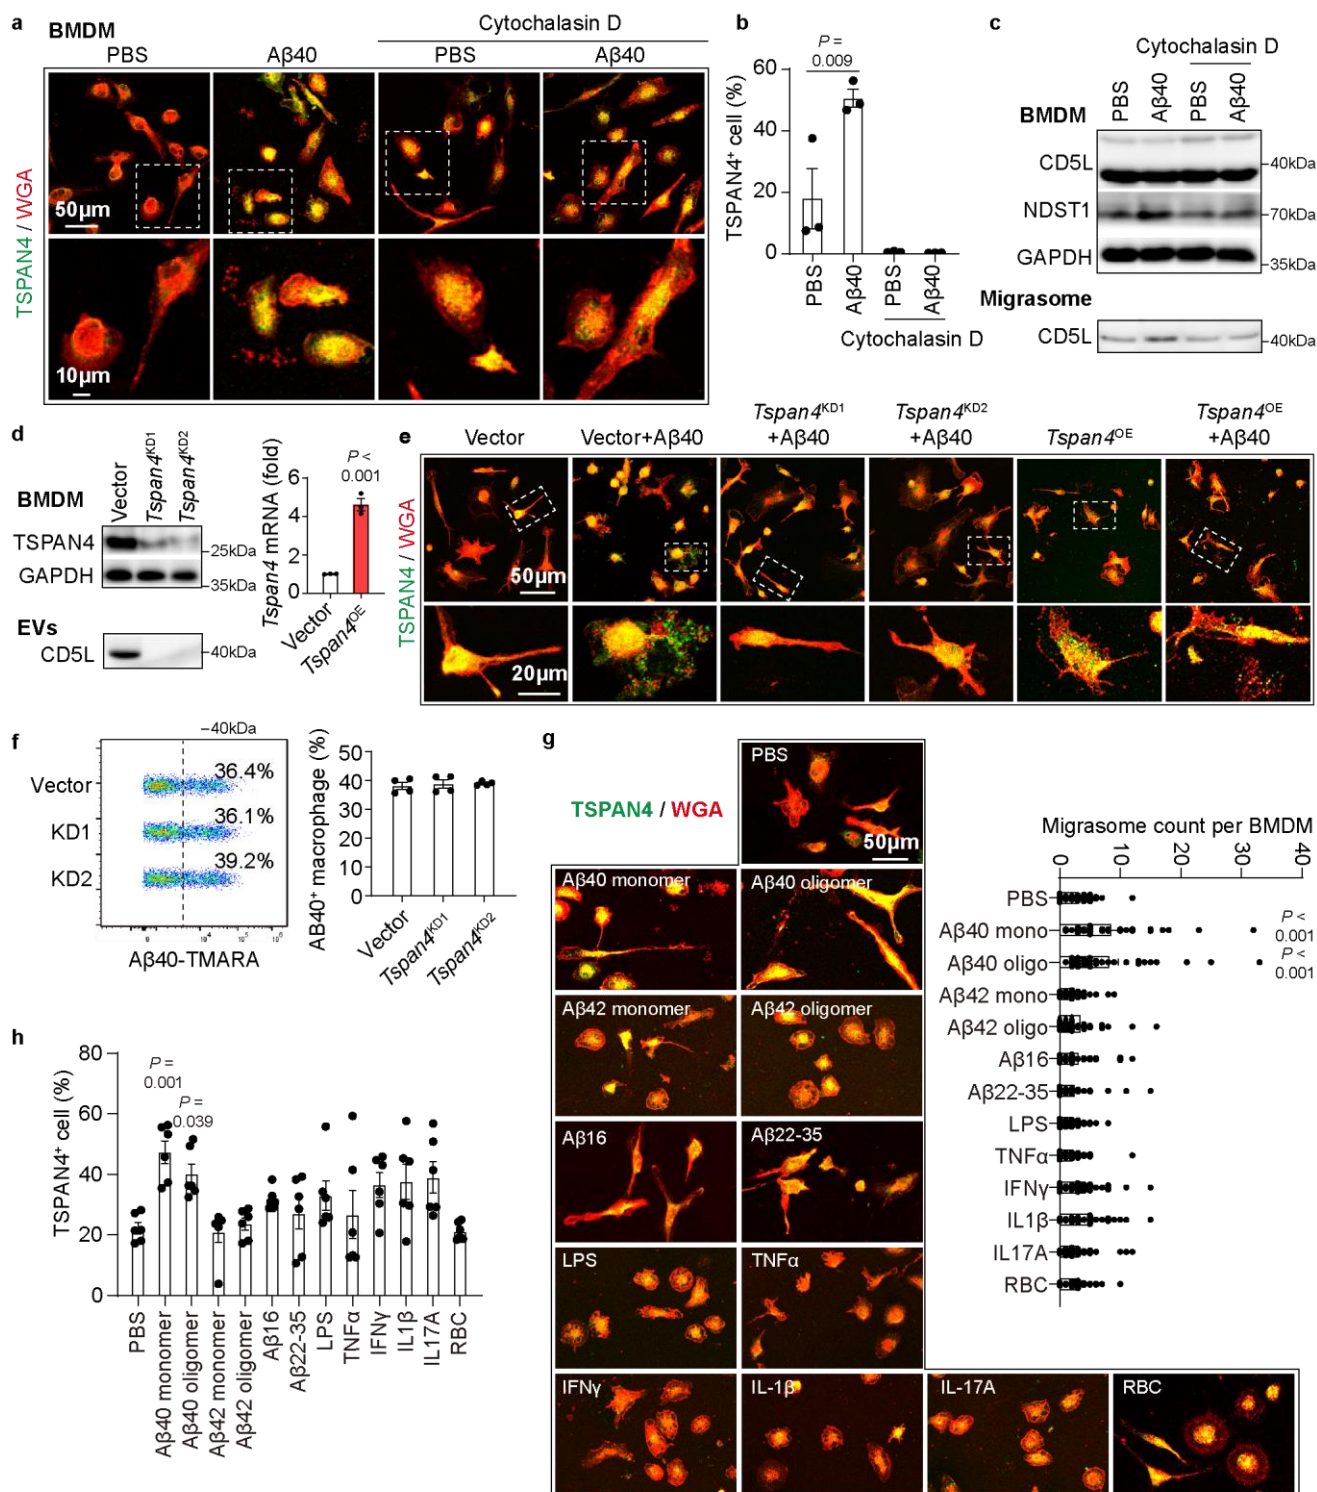

**Figure S8. Phagocytosis of Aβ40 specifically elicits migrasome production in macrophages through up-regulating TSPAN4 expression.** (a-c) Mouse BMDM were pre-treated with Cytochalasin D (CyD, 10μM, overnight) for overnight then stimulated with Aβ40 (20μg/ml, 6h). Data are representative of 3 biologically independent experiments. (a) Co-labeling of WGA (red) and TSPAN4 (green). (b) TSPAN4 expression in CyD-treated BMDM was assessed with flow cytometry. Data are presented as mean values ± SEM with the indicated significance (by one-way ANOVA followed by Tukey's post-test). (c) Expression of CD5L and

117 NDST1 in the CyD-treated BMDM and CD5L level in the extracellular vesicles (EVs) derived from CyD-  
118 treated BMDM as revealed by western blot. **(d-f)** TSPAN4 was over-expressed (OE) or knocked-down (KD)  
119 in BMDM. **(d) Left:** western blot that displayed the knock-down efficiency of TSPAN4 and CD5L expression  
120 in TSPAN4 KD EVs. **Right:** *Tspan4* mRNA level as assessed with QPCR. Data are representative of 3  
121 biologically independent experiments. Data are presented as mean values  $\pm$  SEM with the indicated  
122 significance (by two-tailed Student's *t* test). **(e)** WGA (red) labeling to show the migrasome productivity. Data  
123 are representative of 3 biologically independent experiments. **(f)** Phagocytosis of A $\beta$ 40 (20 $\mu$ g/ml, 1h) by  
124 TSPAN4 KD BMDM as assessed with flow cytometry. Data are representative of 4 biologically independent  
125 experiments and presented as mean values  $\pm$  SEM, and no statistically significant differences were observed  
126 (by one-way ANOVA followed by Tukey's post-test). **(g-h)** The following stimulators were treated to BMDM  
127 for 6h respectively: A $\beta$ 40 monomer (20 $\mu$ g/ml), A $\beta$ 40 oligomer (20 $\mu$ g/ml), A $\beta$ 42 monomer (20 $\mu$ g/ml), A $\beta$ 42  
128 oligomer (20 $\mu$ g/ml), A $\beta$ 16 monomer (20 $\mu$ g/ml), A $\beta$ 22-35 monomer (20 $\mu$ g/ml), LPS (100ng/ml), TNF $\alpha$   
129 (20ng/ml), IFN $\gamma$  (20ng/ml), IL-1 $\beta$  (20ng/ml), IL-17A (20ng/ml) and red blood cells (RBC) (BMDM : RBC =  
130 1 : 5). **(g)** Co-labeling of WGA (red) and TSPAN4 (green) of BMDM. **(h)** Expression of TSPAN4 in the  
131 stimulated BMDM was assessed with flow cytometry. Data are representative of 6 biologically independent  
132 experiments **(h)** and migrasomes of 30 cells are calculated **(g)**. Data are presented as mean values  $\pm$  SEM with  
133 the indicated significance (by one-way ANOVA followed by Tukey's post-test). Source data are provided as  
134 a Source Data file.



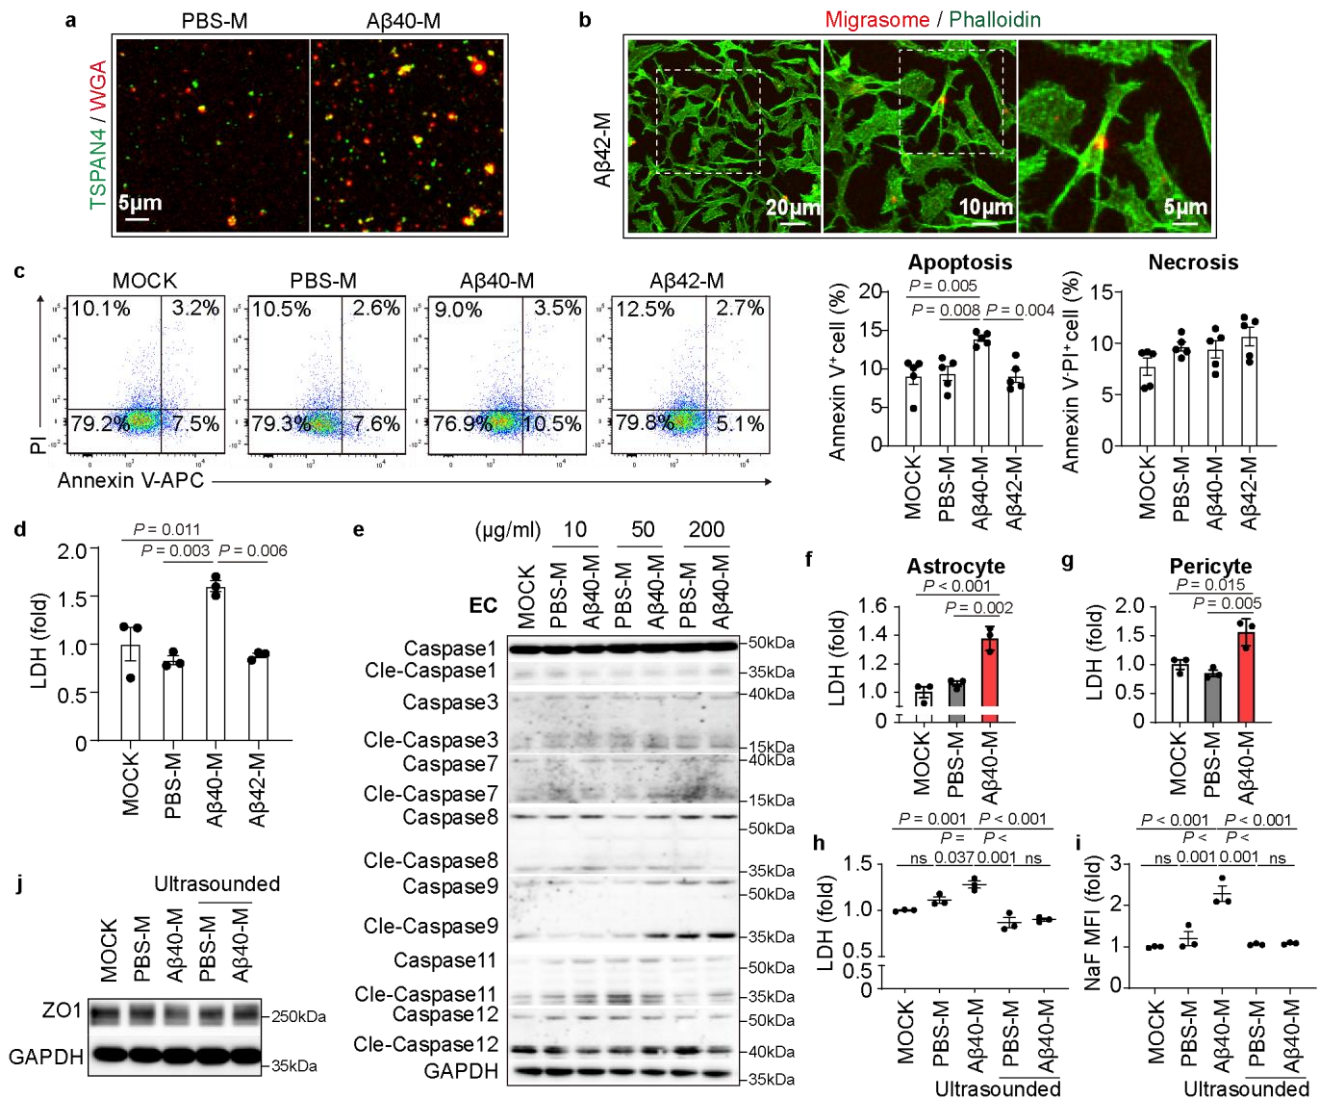

**Figure S9. Migrasomes derived from macrophages upon Aβ40 stimulation are injurious to BBB components which is dependent on the migrasome construction.** (a) Purified PBS-M and Aβ40-M labeled with TSPAN4 (green) and WGA (red). Data are representative of 3 biologically independent experiments. (b) Migrasomes derived from Aβ42-treated BMDM (Aβ42-M) were labeled with Dil (red) before treated to endothelial cells (labeled with Phalloidin, green). Adherence of Aβ42-M to endothelial cells was shown with confocal images. Data shown are representative of 3 biologically independent experiments. (c-d) PBS-M, Aβ40-M or Aβ42-M were treated to brain blood vessel endothelial cells (50μg/ml, 2h). (c) Endothelial injury as assessed with flow cytometric analysis of Annexin V / PI. Data shown are representative of 5 biologically independent experiments. Data are presented as mean values ± SEM with the indicated significance (by one-way ANOVA followed by Tukey's post-test). (d) LDH release of the migrasome-treated endothelial cells. Data shown are representative of 3 biologically independent experiments. Data are presented as mean values ± SEM with the indicated significance (by one-way ANOVA followed by Tukey's post-test). (e) PBS-M or Aβ40-M were treated to endothelial cells at indicated concentration for 2h. Activation of Caspase signalings

149 was evaluated with western blot. Data are representative of 3 biologically independent experiments. **(f-g)** PBS-  
150 M or A $\beta$ 40-M were treated to mouse astrocytes or brain blood vessel pericytes (50 $\mu$ g/ml, 2h). Cell viability  
151 of astrocytes **(f)** and pericytes **(g)** was evaluated with LDH release measurement. Data shown are  
152 representative of 3 biologically independent experiments. Data are presented as mean values  $\pm$  SEM with the  
153 indicated significance (by one-way ANOVA followed by Tukey's post-test). **(h-j)** Migrasomes with intrinsic  
154 structure destroyed by ultrasound (600w, 10min, 3s on/off) were treated to brain vessel endothelial cells  
155 (50 $\mu$ g/ml, 2h). LDH release **(h)**, permeability to NaF **(i)** and ZO-1 expression **(j)** of the endothelial cells were  
156 assessed. Data shown are representative of 3 biologically independent experiments. Data are presented as  
157 mean values  $\pm$  SEM with the indicated significance (by one-way ANOVA followed by Tukey's post-test).  
158 Source data are provided as a Source Data file.

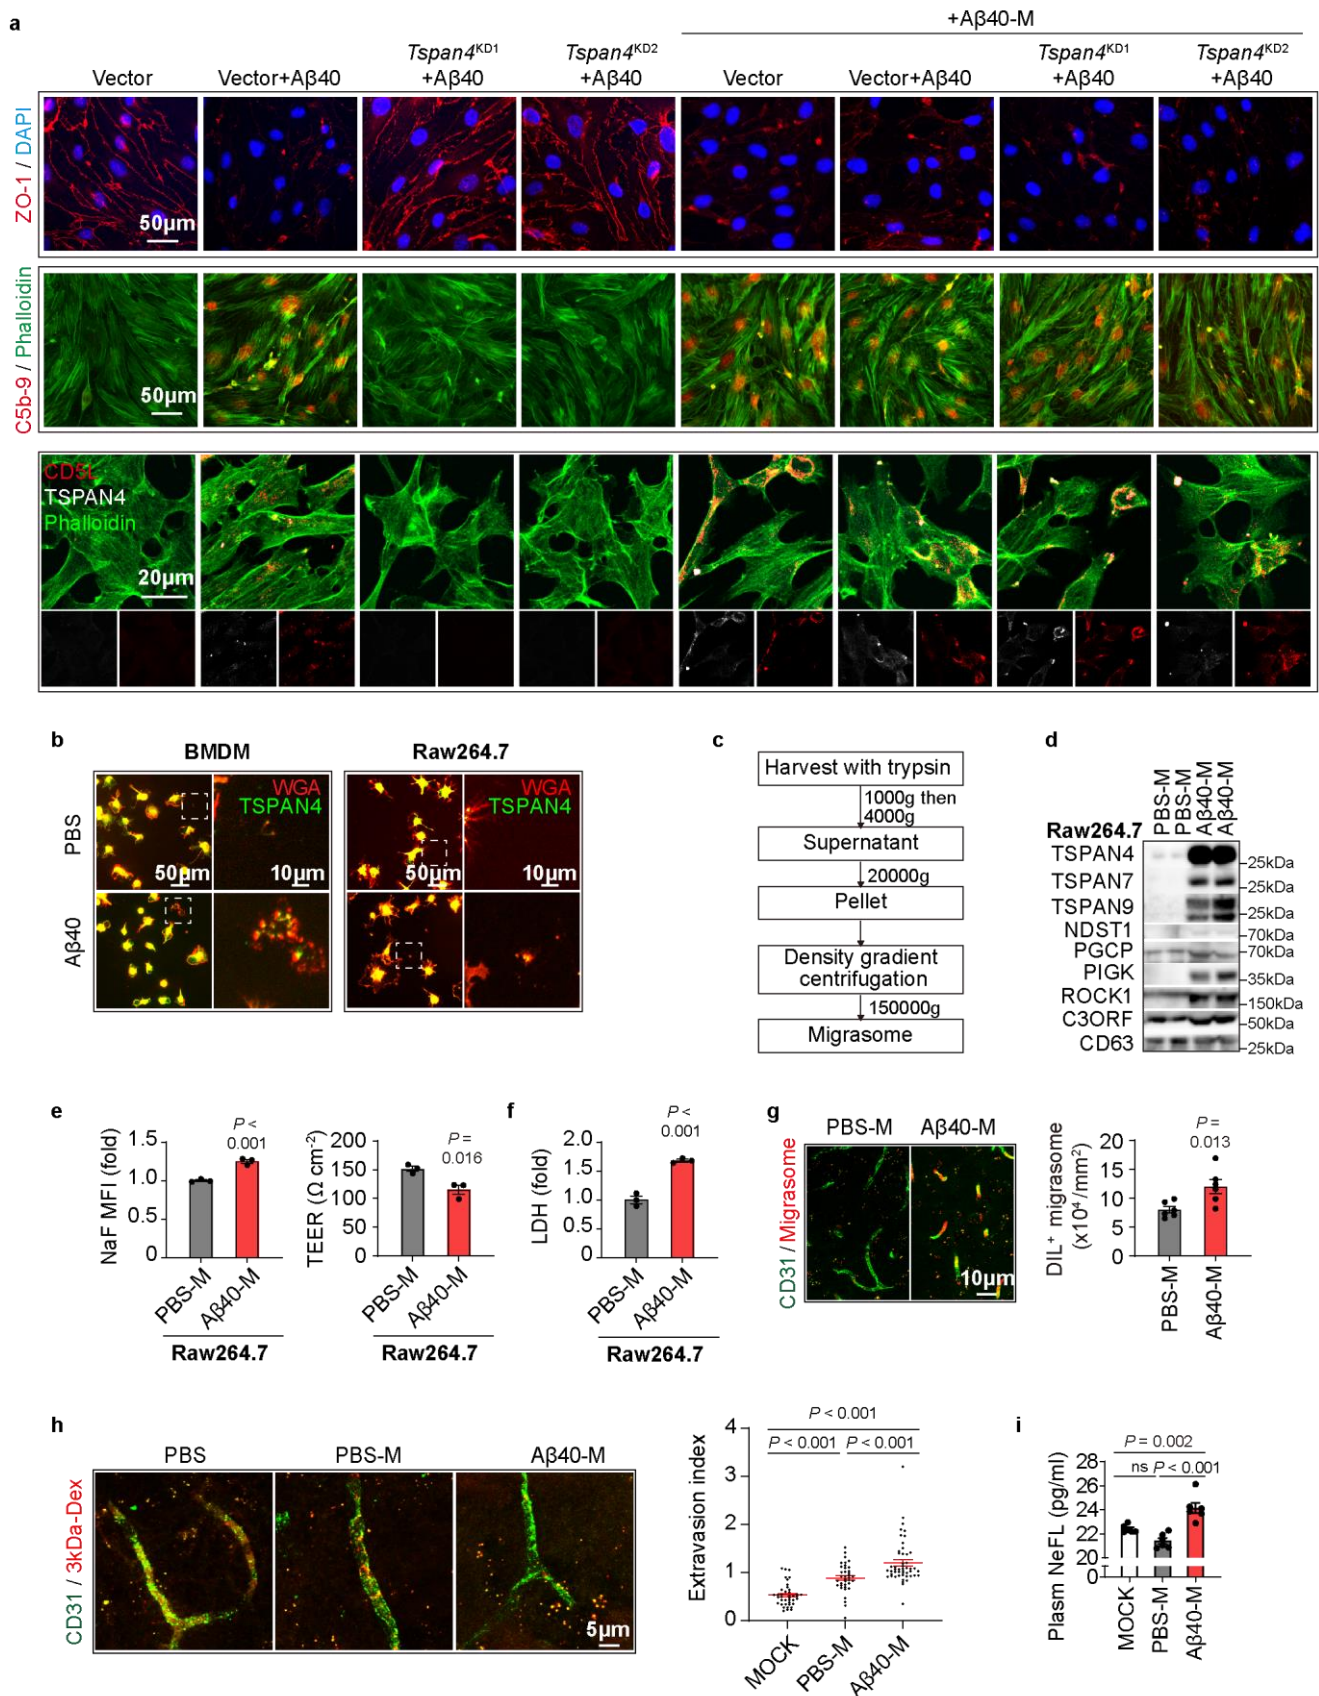

159

160

161

162

**Figure S10. Macrophage-derived migrasomes are adhesive to brain blood vessels and directly damage BBB integrity.** (a) ZO-1 expression of endothelial cells, complement activation (C5b-9<sup>+</sup>) and CD5L deposition were assessed with immunostaining. Data shown are representative of 3 biologically independent

163 experiments. **(b)** Migrasome production was assessed with WGA and TSPAN4 staining. Data shown are  
164 representative of 3 biologically independent experiments. **(c)** Procedure of migrasome collection. **(d)**  
165 Expression of migrasome markers in the collected Raw264.7 cell-derived extracellular vesicles was assessed  
166 by western blot. Data shown are representative of 3 biologically independent experiments. **(e-f)** Permeability  
167 to NaF, the TEER of the barrier, and LDH released by the endothelial barrier were assessed. Data shown are  
168 representative of 3 biologically independent experiments and presented as mean values  $\pm$  SEM with the  
169 indicated significance (by two-tailed Student's *t* test). **(g-i)** Healthy C57/BL6 WT mice (age = 8-10w) were  
170 treated with 4 serial doses of Raw264.7 cell derived migrasomes (10mg/kg, i.v. injected at day 1, 2, 3, 5).  
171 Six days after the first treatment (day 7), recipients were injected with 10mg/kg 3kDa-Dextran at 90min  
172 before sacrifice. *N* = 6 in each group. **(g)** Migrasomes were labeled with Dil before injection.  
173 Immunolabeling with CD31 (green) of the coronal brain sections of the recipients. Migrasomes attached to  
174 the BBB or perfused into the brain parenchyma of recipients had been quantified. Data are presented as  
175 mean values  $\pm$  SEM with the indicated significance (by two-tailed Student's *t* test). **(h)** Extravasation index  
176 of 3kDa-Dextran in brain parenchyma of the recipients was calculated as the ratio of extra- to intra-vessel  
177 3kDa-Dextran MFI which was further normalized to that of MOCK group. MFI of 3kDa-Dextran of 40  
178 vessels in MOCK group, 37 vessels in PBS-M transferred group and 49 vessels in A $\beta$ 40-M transferred  
179 group was calculated. Data are presented as mean values  $\pm$  SEM with the indicated significance (by one-way  
180 ANOVA followed by Tukey's post-test). **(i)** Plasma NeFL level was assessed with ELISA. Data are  
181 presented as mean values  $\pm$  SEM with the indicated significance (by one-way ANOVA followed by Tukey's  
182 post-test). Source data are provided as a Source Data file.

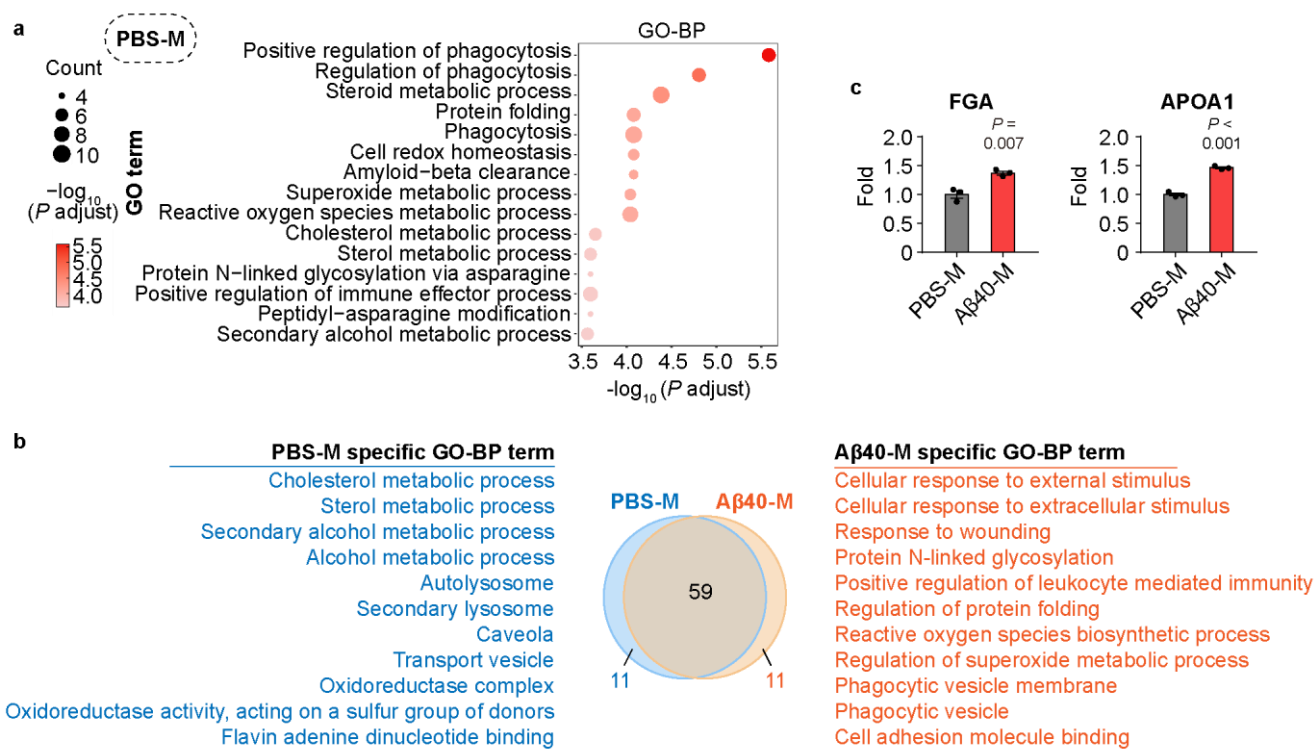

183  
 184 **Figure S11. Macrophage-derived migrasomes participate in metabolic regulation in physiological**  
 185 **context which is diminished upon Aβ40 stimulation.** BMDMs derived migrasomes were collected and  
 186 subjected to ITRAQ.  $N = 3$  in both groups. **(a)** GO-BP analysis of the identified proteins in PBS-M. **(b)**  
 187 Proteins identified in PBS-M and Aβ40-M were subjected to Gene Ontology-biological process (GO-BP)  
 188 projection respectively. Intersection analysis of the enriched GO terms was further performed. **(c)** Expression  
 189 of cell adhesion molecules FGA and APOA1 as assessed with ITRAQ. Data are presented as mean values  $\pm$   
 190 SEM with the indicated significance (by two-tailed Student's  $t$  test). Source data are provided as a Source  
 191 Data file.



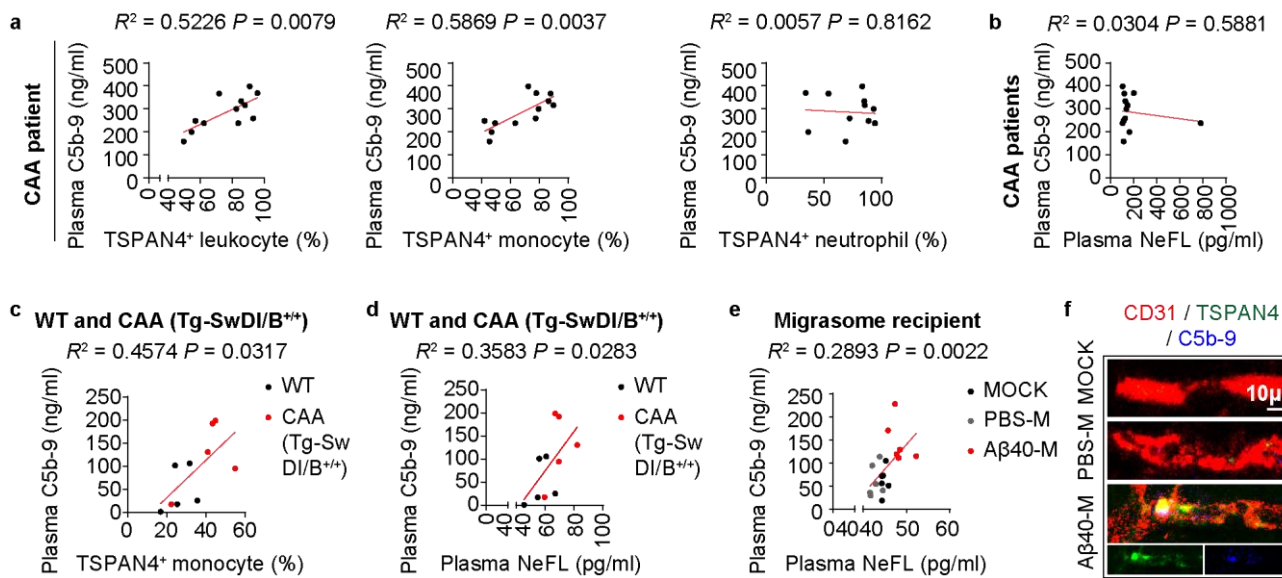

**Figure S12. Excessive migrasome productivity of macrophages contributes to complement activation**

**and BBB impairment in CAA.** (a-b) Peripheral blood of CAA patients ( $N = 12$ ) and healthy donors ( $N = 12$ )

were collected. Plasma C5b-9 and NeFL concentration was assessed with ELISA. TSPAN4 expression in total

leukocytes, monocytes ( $CD14^+$ ) and neutrophils ( $CD66b^+$ ) was analyzed with flow cytometry. Association

between CDC (represented with plasma C5b-9 concentration) with TSPAN4 expression of leukocytes (a, left),

monocytes (a, middle) and neutrophils (a, right), or plasma NeFL level (b) was estimated with Spearman

correlation analysis. (c-d) Age- and sex-matched WT and Tg-SwDI/B<sup>+/+</sup> mice were sacrificed at 24w of age

and peripheral blood was collected ( $N = 5$  in each group). Plasma C5b-9 and NeFL concentration was assessed

with ELISA. TSPAN4 expression in monocytes ( $CD45^+F4/80^+$ ) was analyzed with flow cytometry.

Association between CDC with TSPAN4 expression of monocytes (c) or plasma NeFL level (d) was estimated

with Spearman correlation analysis. (e-f) Healthy C57/BL6 WT mice (age = 8-10w) were treated with 4 serial

doses of migrasomes (10mg/kg, i.v. injected at day 1, 2, 3, 5). Mice were sacrificed at day 7 and peripheral

blood samples were collected.  $N = 6$  in each group. (e) Plasma C5b-9 and NeFL concentration was assessed

with ELISA. Association between CDC with plasma NeFL level was estimated with Spearman correlation

analysis. (f) Coronal brain sections of the recipients were collected and subjected to immunostaining of CD31

(red), TSPAN4 (green) and C5b-9 (blue). Scale bar = 10 $\mu$ m. Data shown are representative of 4 biologically

independent experiments. Representative images of confocal microscopy were presented. Source data are

provided as a Source Data file.

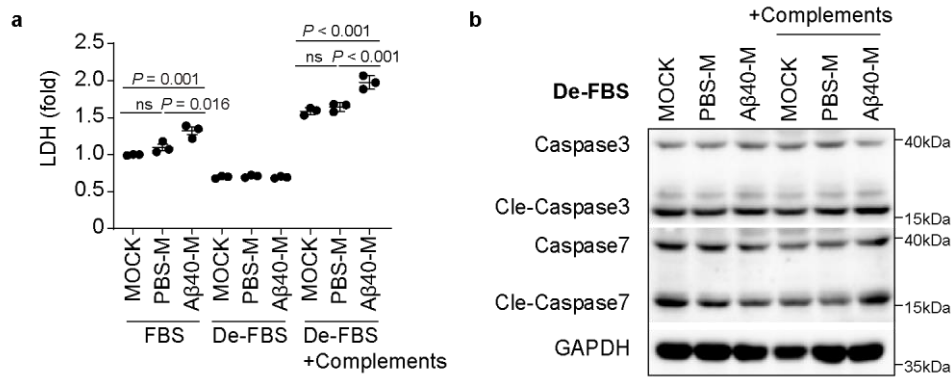

**Figure S13. Complement dependent cytotoxicity is indispensable for migrasome mediated blood vessel injury.** Brain vessel endothelial cells were treated with 50µg/ml of BMDM-derived migrasomes for 2h with normal FBS, heat-deactivated FBS (65°C, 60min) ± human peripheral blood complement mixture (10% in culture system). LDH release in the culture medium was assessed with ELISA (**a**) and Caspase-3 and -7 activation in the endothelial cells was analyzed with western blot (**b**). Data shown are representative of 3 biologically independent experiments. Data are presented as mean values ± SEM with the indicated significance (by one-way ANOVA followed by Tukey's post-test). Source data are provided as a Source Data file.

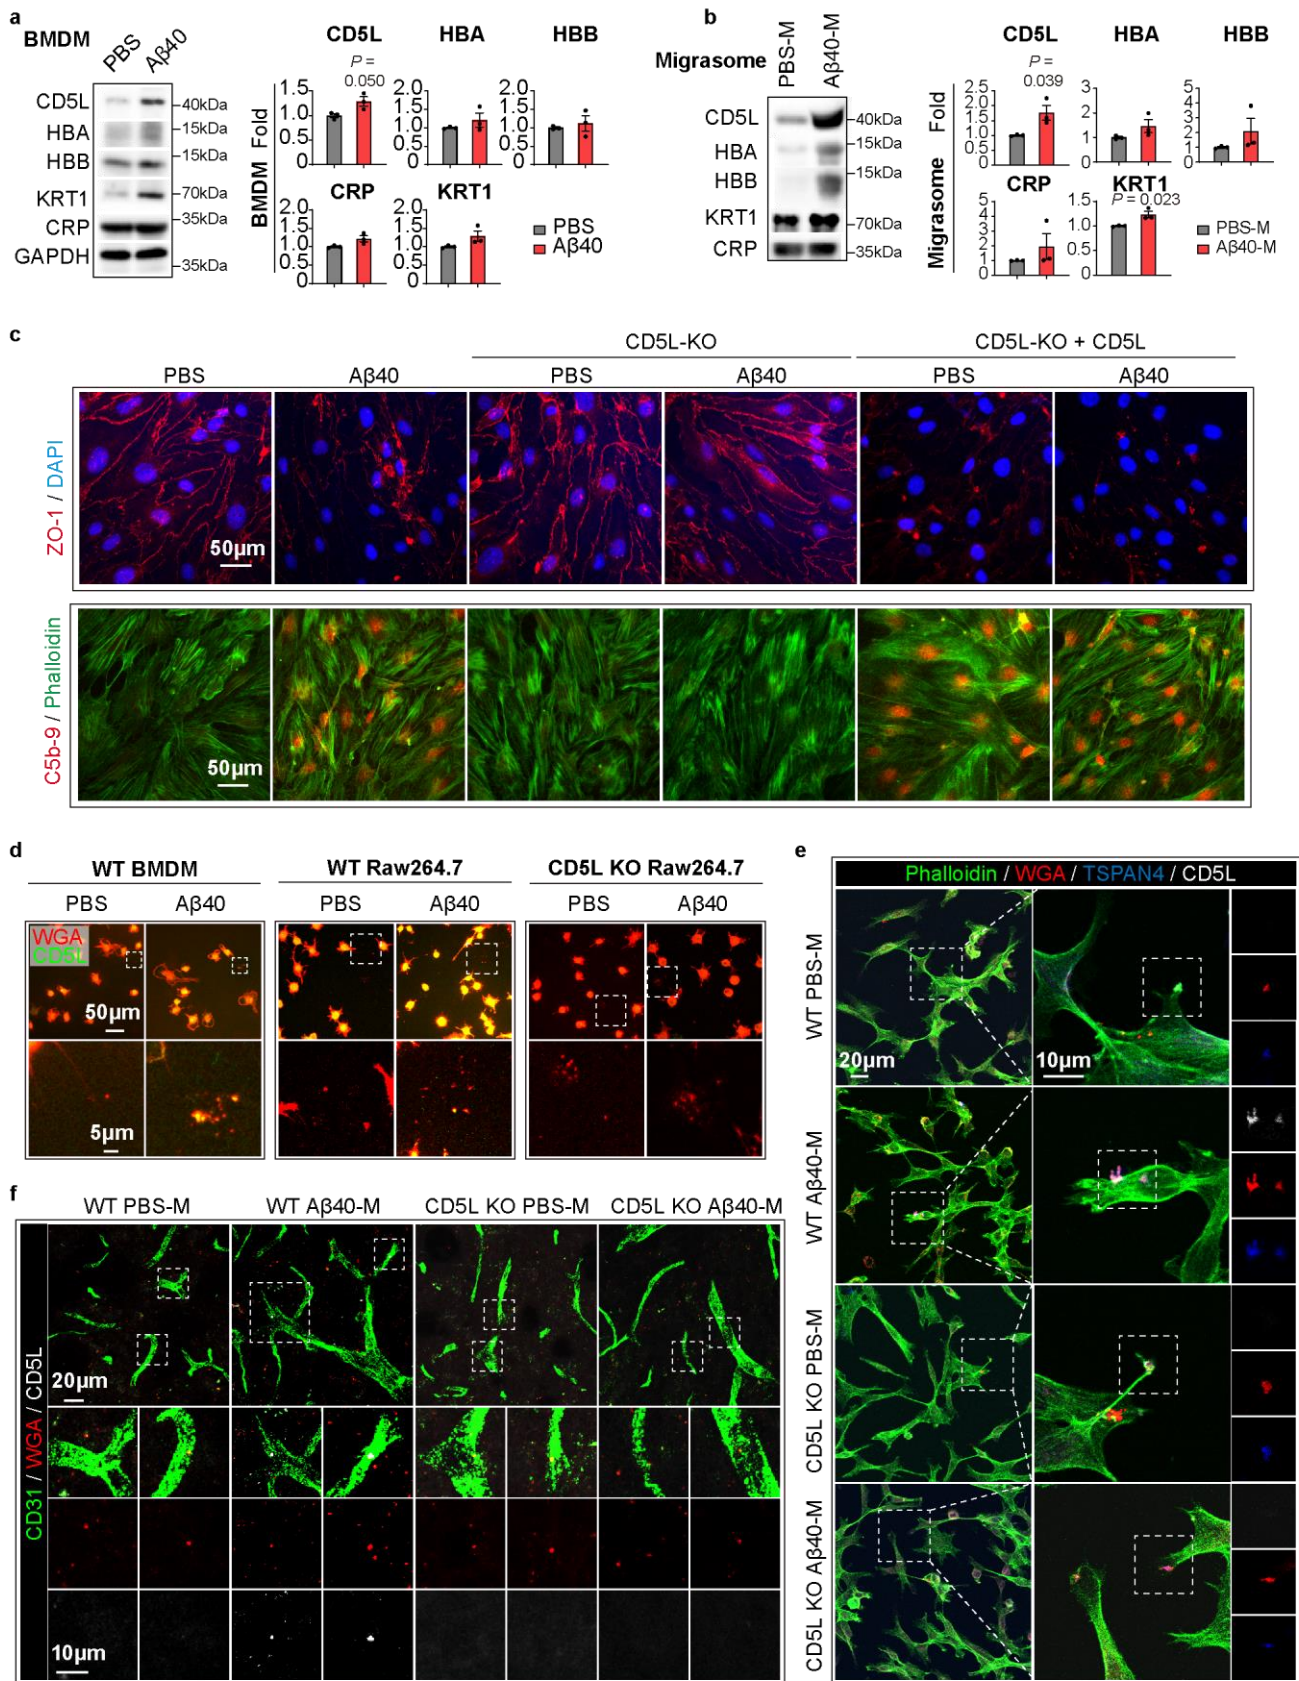

**Figure S14. CD5L is enriched in macrophage-derived migrasomes upon A $\beta$ 40 stimulation.** Mouse BMDM were treated with A $\beta$ 40 (50 $\mu$ g/ml, 6h). Expression of the increased complement activation associated proteins in A $\beta$ 40-M identified with ITRAQ in BMDM (a) and the migrasome product (b) was assessed with

224 western blot. Data shown are representative of 3 biologically independent experiments. Data are presented as  
225 mean values  $\pm$  SEM with the indicated significance (by two-tailed Student's *t* test). (c) WT or CD5L KO  
226 Raw264.7 cells were stimulated with A $\beta$ 40 (20 $\mu$ g/ml, 6h). The Raw264.7 cells (upper chamber) were then  
227 cocultured with brain blood vessel endothelial cells (lower chamber) in a transwell based system (2h). ZO-1  
228 expression of endothelial cells and complement activation (C5b-9<sup>+</sup>) were assessed with immunostaining. Data  
229 shown are representative of 3 biologically independent experiments. (d) WT BMDM, WT Raw264.7 and or  
230 CD5L KO Raw254.7 cells were stimulated with A $\beta$ 40 (20 $\mu$ g/ml, 6h). Migrasome production and the presence  
231 of CD5L as cargo was assessed with immunostaining. Data shown are representative of 3 biologically  
232 independent experiments. (e) Migrasomes produced by WT or CD5L KO Raw264.7 cells were collected and  
233 stained with WGA. The WGA labeled migrasomes were treated to brain blood vessel endothelial cells  
234 (50 $\mu$ g/ml, 2h). Attachment of migrasomes (WGA<sup>+</sup>TSPAN4<sup>+</sup>) to endothelial cells (Phalloidin outlined) and  
235 release of CD5L were assessed with confocal microscopy. Data shown are representative of 3 biologically  
236 independent experiments. (f) WT or CD5L KO Raw264.7 cells were stimulated with A $\beta$ 40 (20 $\mu$ g/ml, 6h).  
237 Migrasomes produced by Raw264.7 cells were collected and stained with WGA. The WGA labeled  
238 migrasomes were transferred to healthy C57/BL6 WT mice (age = 8-10w) (10mg/kg, *i.v.* injected at day 1, 2,  
239 3, 5). Six days after the first treatment (day 7), recipients were sacrifice. Presence of the transferred  
240 migrasomes (WGA<sup>+</sup>) in blood vessel (CD31<sup>+</sup>) and CD5L loaded in the migrasomes were assessed with  
241 immunostaining and microscopy. *N* = 6 in PBS-M, A $\beta$ 40-M and CD5L KO A $\beta$ 40-M transferred mice and *N*  
242 = 5 in CD5L KO PBS-M treated group. Source data are provided as a Source Data file.



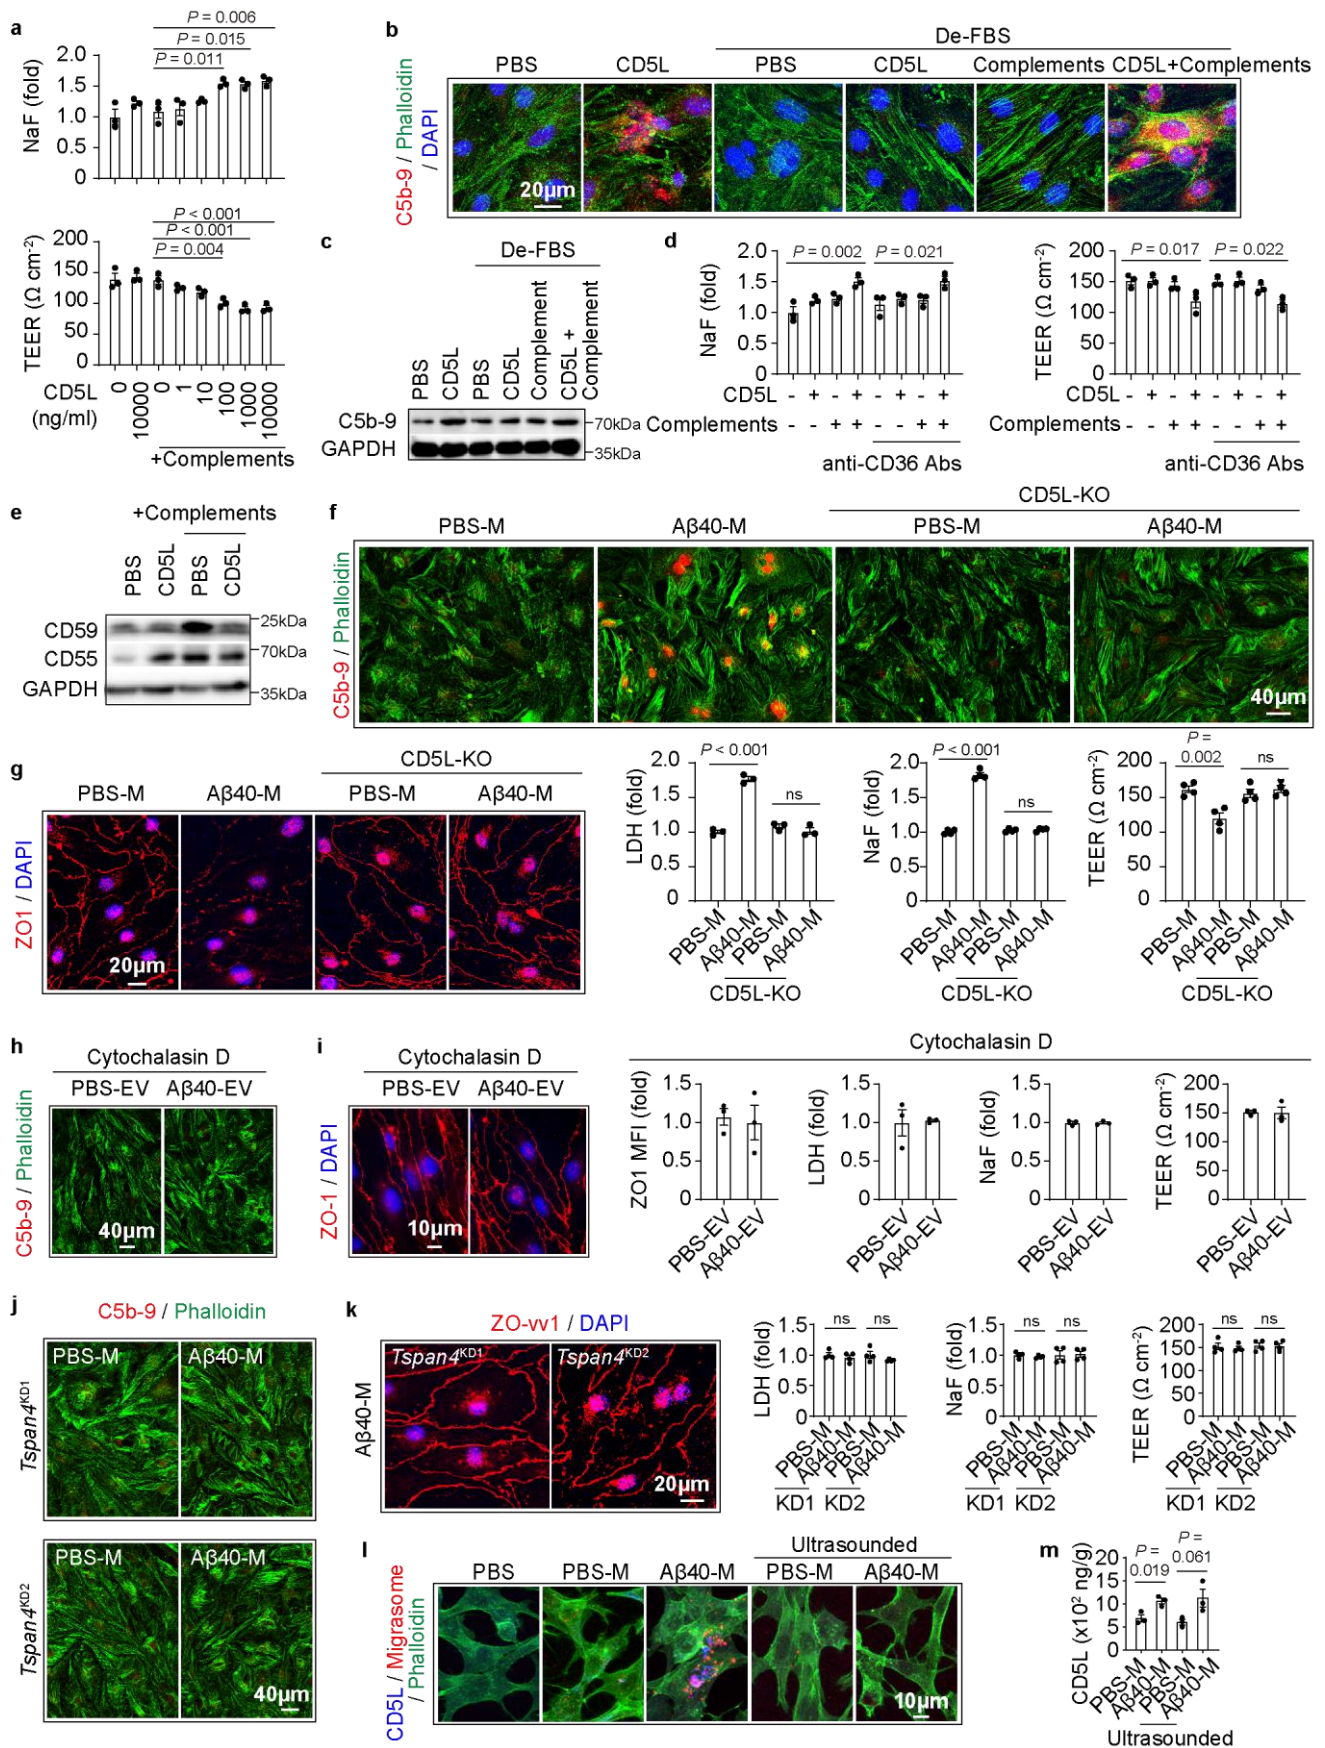

**Figure S15. Aβ40-elicited macrophage-derived migrasomes damage BBB through CD5L-associated**

**CDC.** (a-e) Endothelial cells were cultured with normal or heat-deactivated FBS (65°C, 60min) ± human

peripheral blood complement mixture (10%). (a) Permeability to NaF and the TEER of the barrier were



247 assessed at 2h. Data are representative of 3 biologically independent experiments and presented as mean values  
248  $\pm$  SEM with the indicated significance (by one-way ANOVA followed by Tukey's post-test). **(b-c)** MAC  
249 (C5b-9) formation in endothelial cells was assessed with immunostaining **(b)** and western blot **(c)**. Data are  
250 representative of 3 biologically independent experiments. **(d)** Permeability to NaF and TEER of the barrier  
251 were assessed at 2h. Data are representative of 3 biologically independent experiments and presented as mean  
252 values  $\pm$  SEM with the indicated significance (by one-way ANOVA followed by Tukey's post-test). **(e)**  
253 Expression of CD59 and CD55 was assessed with western blots. Data are representative of 3 biologically  
254 independent experiments. **(f-k)** A $\beta$ 40 (20 $\mu$ g/ml) was treated to CD5L KO Raw264.7 macrophages **(f-g)**, CyD-  
255 treated BMDM (10 $\mu$ M, overnight) **(h-i)** or TSPAN4 KD BMDM **(j-k)** for 6h. MAC (C5b-9) formation in  
256 endothelial cells was assessed **(f, h, j)**. Injury of the endothelial barrier was evaluated with the ZO-1 expression,  
257 LDH release, permeability to NaF and TEER **(g, i, k)**. Data in the LDH release of **(g)**, and data in **(i)** are  
258 representative of 3 biologically independent experiments. Data in the NaF and TEER experiment of **(g)**, and  
259 data in **(k)** are representative of 4 biologically independent experiments. Data are presented as mean values  $\pm$   
260 SEM with the indicated significance (by one-way ANOVA followed by Tukey's post-test **(g and k)** and two-  
261 tailed Student's *t* test **(i)**). **(l)** Immunostaining of CD5L and phalloidin was performed. Data shown are  
262 representative of 3 biologically independent experiments. **(m)** CD5L concentration in A $\beta$ 40-M and PBS-M  
263 was assessed with ELISA. Data are representative of 3 biologically independent experiments. Data are  
264 presented as mean values  $\pm$  SEM with the indicated significance (by one-way ANOVA followed by Tukey's  
265 post-test). Source data are provided as a Source Data file.

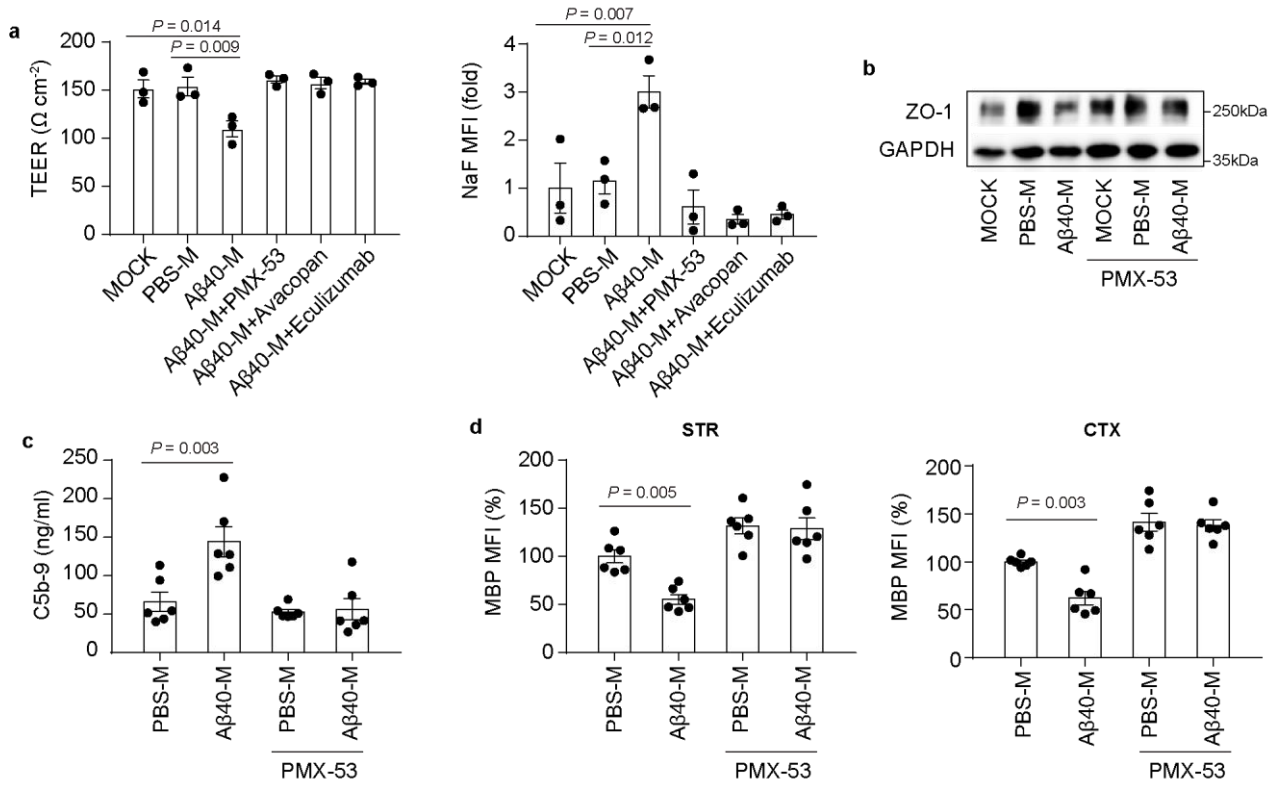

**Figure S16. Complement inhibitory treatment reverses the injurious effects of macrophage-derived**

**migrasomes to brain blood vessels.** (a) Brain vessel endothelial cells were seeded on top of a cell culture insert (pore diameter = 0.4 $\mu$ m) as a simulation of endothelial barrier. Migrasomes (50 $\mu$ g/ml) were treated to the endothelial barrier in addition with PMX-53 (10 $\mu$ g/ml), Avacopan (2 $\mu$ M) or Eculizumab (100 $\mu$ g/ml). Permeability to NaF and TEER of the barrier were assessed at 2h. Data shown are representative of 3 biologically independent experiments. Data are presented as mean values  $\pm$  SEM with the indicated significance (by one-way ANOVA followed by Tukey's post-test). (b) Migrasomes (50 $\mu$ g/ml) were treated to the brain blood vessel endothelial cells in addition with PMX-53 (10 $\mu$ g/ml) for 2h. ZO-1 expression of the endothelial cells was assessed with western blot. Data shown are representative of 3 biologically independent experiments. (c-d) Healthy C57/BL6 WT mice (age = 8-10w) were treated with 4 serial doses of Raw264.7 cell derived migrasomes (10mg/kg, i.v. injected at day 1, 2, 3, 5) in addition with PMX-53 treatment (0.25mg per mouse, o.p.). Mice were sacrificed at day 7 after first migrasome injection. (c) Plasma C5b-9 level of the recipients was assessed with ELISA.  $N = 6$  in each group. Data are presented as mean values  $\pm$  SEM with the indicated significance (by one-way ANOVA followed by Tukey's post-test). (d) Myelin integrity of recipients was assessed with MBP immunostaining. Representative confocal images were displayed in **Figure 7e**. MBP MFI in striatum (STR) and cortex (CTX) was calculated.  $N = 6$  in each group. Data are presented as mean values  $\pm$  SEM with the indicated significance (by one-way ANOVA followed by Tukey's post-test). Source data are provided as a Source Data file.

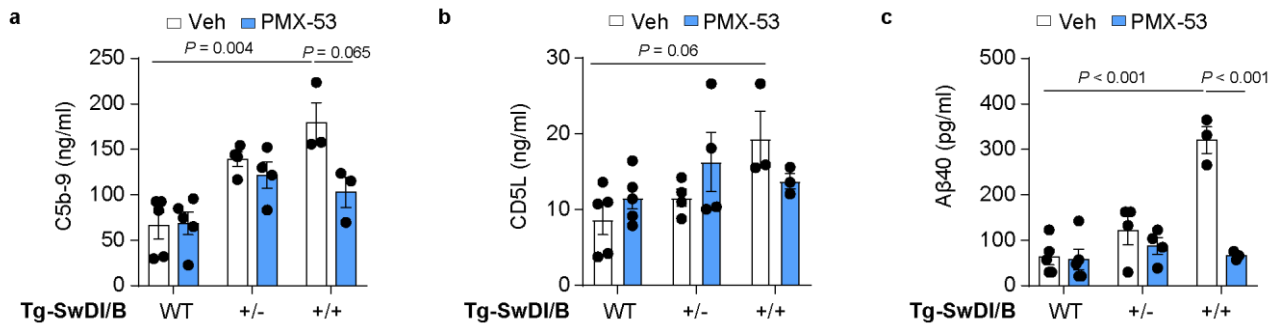

**Figure S17. Complement inhibitory therapy protects against CAA without altering plasma Aβ40 and CD5L level.** Tg-SwDI/B<sup>+/+</sup>, Tg-SwDI/B<sup>+/-</sup> and WT mice were treated with PMX-53 (0.25mg per mouse, o.p., for 4 weeks). Mice were sacrificed at 12w of age. Plasma concentration of C5b-9 (a), CD5L (b) and Aβ40 (c) was assessed with ELISA. *N* = 6 in each WT ± PMX-53 groups, *N* = 4 in Tg-SwDI/B<sup>+/-</sup> ± PMX-53 groups; *N* = 3 in Tg-SwDI/B<sup>+/+</sup> ± PMX-53 groups. Data are presented as mean values ± SEM with the indicated significance (PMX53 treated Tg-SwDI/B<sup>+/+</sup> group compared with vehicle treated Tg-SwDI/B<sup>+/+</sup> group: by two-tailed Student's *t* test; vehicle-treated Tg-SwDI/B<sup>+/+</sup> group compared with vehicle-treated WT group: by one-way ANOVA followed by Tukey's post-test. Source data are provided as a Source Data file.

Table S1. Clinic characteristics of the individuals recruited in the study.

| Clinical Characteristics                | Healthy control | CAA                        | AIS          | CADASIL                    | aCSVD                      | AD                      |
|-----------------------------------------|-----------------|----------------------------|--------------|----------------------------|----------------------------|-------------------------|
|                                         | N =12           | N =12                      | N =10        | N =10                      | N =28                      | N =10                   |
| Age, y                                  | 70.67±1.13      | 74.67±2.56                 | 76.30±2.05   | 46.80±4.49                 | 71.00±1.51                 | 73.10±1.29              |
| Male, <i>n</i> (%)                      | 6 (50.00%)      | 8 (66.67%)                 | 4 (40.00%)   | 6 (60.00%)                 | 19 (67.86%)                | 5 (50.00%)              |
| Hypertension, <i>n</i> (%)              | 0               | 6 (50.00%)                 | 5 (50.00%)   | 2 (20.00%)                 | 20 (71.43%)                | 5 (50.00%)              |
| Diabetes mellitus, <i>n</i> (%)         | 0               | 3 (25.00%)                 | 1 (10.00%)   | 2 (20.00%)                 | 7 (25.00%)                 | 1 (10.00%)              |
| Symptomatic stroke, <i>n</i> (%)        | 0               | 7 (58.33%)                 | 10 (100.00%) | 4 (40.00%)                 | 7 (25.00%)                 | 1 (10.00%)              |
| <b>Medication History, <i>n</i> (%)</b> |                 |                            |              |                            |                            |                         |
| Antithrombotic therapy                  | 0               | 3 (25.00%)                 | 0            | 1 (10.00%)                 | 9 (32.14%)                 | 1 (10.00%)              |
| Statins therapy                         | 0               | 4 (33.33%)                 | 0            | 1 (10.00%)                 | 10 (35.71%)                | 2 (20.00%)              |
| Antihypertensive therapy                | 0               | 5 (41.67%)                 | 3 (30.00%)   | 2 (20.00%)                 | 18 (64.29%)                | 4 (40.00%)              |
| Antidiabetic therapy                    | 0               | 3 (25.00%)                 | 1 (10.00%)   | 0                          | 6 (21.43%)                 | 1 (10.00%)              |
| <b>Laboratory Variables</b>             |                 |                            |              |                            |                            |                         |
| Cholesterol (mmol/L)                    | 5.18±0.29       | 4.12±0.30                  | 4.85±0.25    | 4.18±0.31                  | 4.53±0.22                  | 4.81±0.43               |
| Fasting glucose (mmol/L)                | 4.82±0.25       | 5.89±0.40                  | 5.91±0.61    | 5.33±0.42                  | 5.86±0.27                  | 5.23±0.69               |
| Triglyceride (mmol/L)                   | 1.36±0.29       | 1.26±0.18                  | 1.07±0.11    | 1.21±0.21                  | 1.50±0.15                  | 108±0.22                |
| HDL-C (mmol/L)                          | 1.95±0.15       | 1.17±0.10                  | 1.13±0.15    | 1.19±0.06                  | 1.07±0.07                  | 1.16±0.12               |
| LDL-C (mmol/L)                          | 2.80±0.24       | 2.38±0.33                  | 3.29±0.22    | 2.60±0.30                  | 2.74±0.15                  | 3.01±0.40               |
| <b>Neuropsychological test</b>          |                 |                            |              |                            |                            |                         |
| MoCA                                    | /               | 10.50<br>(6.75-<br>18.50)  | /            | 24.50<br>(19.25-<br>25.00) | 21.00<br>(18.50-<br>23.00) | 12.00 (9.50-<br>14.70)  |
| MMSE                                    | /               | 18.50<br>(13.75-<br>27.25) | /            | 28.50<br>(25.25-<br>29.00) | 27.00<br>(25.00-<br>29.00) | 21.50 (19.00-<br>23.00) |

295

296

297

Results were presented as mean ± SEM for normally distributed continuous variables and median (quartiles) for skewedly distributed continuous variables. HDL-C, high density lipoprotein cholesterol; LDL-C, low density lipoprotein cholesterol.

**Table S2. Imaging characteristics of CSVD patient.**

| <b>Imaging Characteristics</b>     | <b>CAA N =12</b> | <b>CADASIL N =10</b> | <b>aCSVD N =28</b> |
|------------------------------------|------------------|----------------------|--------------------|
| Presence of cSS, n (%)             | 9 (75.00%)       | 0                    | 0                  |
| CMB Counts, medium (quartiles)     | 2.50 (1.00-8.25) | 12.00 (0.50-21.75)   | 1.00 (0.00-3.25)   |
| d-WHN Fazekas, medium (quartiles)  | 2.00 (1.00-3.00) | 2.00 (2.00-2.00)     | 1.50 (1.00-2.00)   |
| p-WHN Fazekas, medium (quartiles)  | 2.00 (1.00-3.00) | 2.00 (2.00-3.00)     | 2.00 (1.00-2.00)   |
| PVS Scores, medium (quartiles)     | 2.00 (1.00-2.00) | 2.00 (2.00-2.00)     | 2.00 (0.00-3.00)   |
| Lacunar Counts, medium (quartiles) | 4.00 (2.75-6.00) | 0.00 (0.00-0.75)     | 1.00 (0.00-2.00)   |
| CAA Burden, medium (quartiles)     | 3.50 (2.00-5.00) | 2.00 (2.00-2.00)     | 1.00 (0.00-2.00)   |
| CSVD Burden, medium (quartiles)    | 4.00 (3.00-4.00) | 3.00 (2.00-3.75)     | 2.00 (1.00-3.00)   |
